# Supplementary material
Source: PubMed Central journal article supplement (PMC6560146)
Supplement: JB.00151-19-s0001.pdf [file JB.00151-19-s0001.pdf]

# SUPPLEMENTAL INFORMATION

## Identification of novel Spx regulatory pathways in *Bacillus subtilis* uncovers a close relationship between the CtsR and Spx regulons

Daniel F. Rojas-Tapias<sup>1,2</sup> & John D. Helmann<sup>1\*</sup>

<sup>1</sup> Department of Microbiology, Cornell University, Ithaca, NY 14853, US.

<sup>2</sup> Current address: Infectious Diseases and Microbiome Program, The Broad Institute of MIT and Harvard, Cambridge, MA 02142, US.

\* Corresponding author: John D. Helmann, Ph.D. Department of Microbiology, Wing Hall, Cornell University, Ithaca, NY 14853-8101. Phone: +1-607-255-6570. Fax: 607-255-3904. e-mail: jdh9@cornell.edu

**Running title:** Regulation of Spx by ClpCP and McsB.

### Supplementary Experimental Methods

Strains construction

### Tables

Table S1 Sites of transposon insertions

Table S2 List of strains

Table S3 List of primers

Table S4 Co-occurrence of Spx and related proteins in representative Firmicutes species

### Figures

Fig. S1 The phenotype due to *ctsR* inactivation is explained by ClpP proteolysis as well as another unknown pathway.

Fig. S2 *In vivo* ClpX-independent Spx degradation in *Bacillus subtilis* occurs through ClpCP.

Fig. S3 Elevated arginine phosphorylation affects Spx activity

Fig. S4 Spx accumulation negatively affects bacterial growth

Fig. S5 Alignment of Spx proteins in different species

## Supplementary Experimental Methods

### Strains construction

For overlap PCR, one first round of PCR without primers was performed using the following program: initial denaturation (98°C x 1'), 5 cycles of assembly (98°C x 10", T<sub>m</sub>+5°C x 40", and 72°C x 30" per kb"), 5 cycles of assembly (98°C x 10", T<sub>m</sub> °C x 40", and 72°C x 30" per kb), and 5 cycles of assembly (98°C x 10", T<sub>m</sub>-5°C x 40", and 72°C x 30" per kb). Equimolar amounts of both DNA fragments were used (~50 ng of the smallest fragment) for assembly. Then 3 µl of the resulting product was used for conventional PCR amplification; the PCR reactions were performed as recommended by the manufacturer. For deletion of the erythromycin or kanamycin cassettes in the strains from the Bacillus Genomic Stock Center (BGSC) the pDR244 plasmid was used (1).

For construction of the *spx* allele under control of the hy-spank promoter [i.e. P<sub>hs</sub>-*spx* (*cm*)], the PCR product obtained with primers DR445 and DR446 was used. For construction of the IPTG-inducible *ctsR* allele [i.e. P<sub>hs</sub>-*ctsR* (*cm*)], the fragment containing the *ctsR* gene was amplified using the primers DR315 and DR316. To generate the *ctsR*<sup>R63E</sup> allele under IPTG control [i.e. P<sub>hs</sub>-*ctsR*<sup>R63E</sup> (*cm*)], the mutagenic primers DR345 and DR346 were additionally used, and the resulting PCR products were ligated by overlap PCR. The resulting fragments of *spx*, *ctsR*, and *ctsR*<sup>R63E</sup>, as well as the pPL82 vector (2), were digested with XmaI and XbaI, ligated using the T4 ligase, and transformed into *E. coli* DH5a. The generated vectors were used to transform *B. subtilis*.

For construction of the mutant *spx* alleles, the following mutagenic primers were used *spx*<sup>R14K</sup>: DR415 and DR416, *spx*<sup>R91K</sup>: DR393 and DR394, *spx*<sup>R92K</sup>: DR426 and DR427, *spx*<sup>R100K</sup>: DR419 and DR420, *spx*<sup>R112K</sup>: DR397 and DR398. And the primers DR445 and DR446 were used as external primers. The fragments and the pPL82 vector were digested with XmaI and XbaI, ligated using the T4 ligase, and transformed into *E. coli* DH5a. The generated vectors were used to transform *B. subtilis*.

For construction of the *amyE::ctsR* (*cm*) complementation cassette, a fragment covering the *ctsR* coding region and its promoter were amplified using primers DR450 and DR451, purified, and digested with EcoRI and BamHI. For construction of the *amyE::ywIE* (*cm*) complementation cassette, the primers DR362 and DR363 were used. The product was digested with EcoRI and HindIII. The resulting PCR products were cloned into pDG1662 (3), which was digested using the appropriate restriction enzymes. Both insert and vector were ligated using T4 ligase, and transformed into *E. coli*. The generated vector was used to transform *B. subtilis*.

For construction of the pMUTIN-Flag (spec) vector, the pMUTIN-Flag (ery) (4) backbone (without the erythromycin resistance cassette) was amplified using primers DR240 and DR241. The spectinomycin resistance cassette was amplified using the primers DR238 and DR239 using the plasmid pDG1661 (3) as template. The resulting PCR fragments were digested with DpnI, and joined using Gibson Assembly. The integrity of the resulting vector was verified by PCR and sequencing.

For construction of  $P_{\text{spac}}\text{-}clpX$ , we amplified the N-terminal region of *clpX* with two sets of primers: first, we used primers DR166 and DR366, and then DR365 and DR342. The goal was to eliminate an internal HindIII restriction site. The resulting PCR products were ligated by overlap PCR. The resulting fragment, as well as the pMUTIN4-Flag (spec) vector, were digested with HindIII and KpnI, ligated using T4 ligase, and transformed into *E. coli* DH5 $\alpha$ . The resulting plasmids were transformed into *E. coli* TG1 to generate multimeric plasmids, and then 1  $\mu\text{g}$  of plasmid DNA used to transform *B. subtilis*.

For construction of the conditional  $P_{\text{spac}}\text{-}mcsA\text{-}mcsB\text{-}clpC$  and  $P_{\text{spac}}\text{-}clpC$  strains using the pMUTIN-Flag (spec) vector, the primers DR452 and DR453, and DR454 and DR455 were used, respectively. The PCR fragments and pMUTIN-Flag (spec) vector were digested with HindIII and KpnI. The digested fragments were then ligated into the digested vector using the T4 ligase. The resulting plasmids were transformed into *E. coli* TG1 to generate multimeric plasmids, and then 1  $\mu\text{g}$  of plasmid DNA used to transform *B. subtilis*.

For construction of the *yjbH::kan* strain the upstream and downstream regions of the *yjbH* region were amplified using the primers DR16 and DR17, and DR18 and DR19 using the genomic DNA of the wild-type strain as template. The kanamycin cassette was amplified using the primers 1295 and 1296 using as template gDNA of the strain HB10216 (5). The three fragments were joined by overlap PCR, and the resulting PCR fragment was used to transform the wild-type strain (HB18501). The kanamycin resistant colonies were verified by PCR and sequencing.

## Supplementary Tables

**Table S1. Sites of transposon insertions<sup>1</sup>**

| Gene                               | Frequency | Function                                                                                                |
|------------------------------------|-----------|---------------------------------------------------------------------------------------------------------|
| <i>lolR</i>                        | 8         | Transcriptional repressor of the <i>iol</i> operon, regulation of myo-inositol catabolism               |
| <i>ctsR</i>                        | 5         | Transcription repressor of class III heat shock genes ( <i>clpC</i> operon, <i>clpE</i> , <i>clpP</i> ) |
| <i>lacZ</i><br><i>Reporter/Spx</i> | 4         | <i>spx</i> gene or P <sub>trxB</sub> - <i>lacZ</i> transcriptional fusion                               |
| <i>galK</i>                        | 3         | Galactokinase. Galactose utilization                                                                    |
| <i>menH</i>                        | 3         | Menaquinone biosynthesis methyltransferase                                                              |
| <i>ywIE</i>                        | 1         | Protein arginine phosphatase                                                                            |
| <i>degV</i>                        | 1         | Fatty acid binding protein                                                                              |
| <i>gndA</i>                        | 1         | NADP-dependent phosphogluconate dehydrogenase. Pentose phosphate pathway                                |
| <i>hrcA</i>                        | 1         | Transcriptional repressor of class I heat-shock genes                                                   |
| <i>hutP</i>                        | 1         | Transcriptional antiterminator                                                                          |
| <i>mccB</i>                        | 1         | Cystathionine lyase/ homocysteine gamma-lyase                                                           |
| <i>murAB</i>                       | 1         | UDP-N-acetylglucosamine 1-carboxyvinyltransferase                                                       |
| <i>pbuG</i>                        | 1         | Hypoxanthin/ guanine permease                                                                           |
| <i>sigH</i>                        | 1         | RNA polymerase sigma factor SigH                                                                        |
| <i>yabR</i>                        | 1         | Unknown                                                                                                 |
| <i>ybcF</i>                        | 1         | Similar to carbonic anhydrase                                                                           |
| <i>yckB</i>                        | 1         | Similar to amino acid ABC transporter (binding protein)                                                 |
| <i>ydcl</i>                        | 1         | Unknown                                                                                                 |
| <i>yfnE</i>                        | 1         | Unknown                                                                                                 |
| <i>yhcE</i>                        | 1         | Similar to ABC transporter (membrane protein)                                                           |
| <i>ylaJ</i>                        | 1         | Efficient spore germination                                                                             |
| <i>yqhT</i>                        | 1         | Degradation of proline-containing peptides                                                              |
| <i>yuiF</i>                        | 1         | Unknown                                                                                                 |
| <i>ywcl</i>                        | 1         | Unknown                                                                                                 |
| <i>yybS</i>                        | 1         | Unknown                                                                                                 |

<sup>1</sup> Insertions sites were mapped using inverse PCR as described in Materials and Methods. Linkage tests have not been conducted to determine if each of these insertions affect Spx activity. Experiments with null mutations confirmed the initially observed effects for *ctsR* and *ywIE*, as described in the main text.

**Table S2. Strains used in this study**

| <b>Strains</b> | <b>Genotype</b>                                                                                                    | <b>Construction or source</b>                                                                                                                                   |
|----------------|--------------------------------------------------------------------------------------------------------------------|-----------------------------------------------------------------------------------------------------------------------------------------------------------------|
| BKE13700       | <i>clpE::ery</i>                                                                                                   | BGSC strain.                                                                                                                                                    |
| HB18501        | <i>168 trpC2</i>                                                                                                   | Lab strain                                                                                                                                                      |
| HB18658        | <i>thrC::P<sub>trxB</sub>-lacZ (ery)</i>                                                                           | (6)                                                                                                                                                             |
| HB18703        | <i>yjbH::kan</i>                                                                                                   | Lab strain                                                                                                                                                      |
| HB18807        | <i>amyE::P<sub>hs</sub>-spx<sup>DD</sup> (spec)</i>                                                                | (7)                                                                                                                                                             |
| HB18930        | <i>clpX::spec</i>                                                                                                  | (5)                                                                                                                                                             |
| HB18931        | <i>clpC::ery</i>                                                                                                   | gDNA of BKE00860 into WT.                                                                                                                                       |
| HB18961        | <i>clpP::tet</i>                                                                                                   | (5)                                                                                                                                                             |
| HB18984        | $\Delta$ <i>ctsR</i>                                                                                               | Derivative of BKE00830 from BGSC. The erythromycin cassette was looped out using pDR244.                                                                        |
| HB18986        | $\Delta$ <i>mcsB</i>                                                                                               | Derivative of BKE00850 from BGSC. The erythromycin cassette was looped out using pDR244.                                                                        |
| HB23017        | $\Delta$ <i>ctsR thrC::P<sub>trxB</sub>-lacZ (ery)</i>                                                             | This work. gDNA of HB18658 was moved into HB18984.                                                                                                              |
| HB23019        | $\Delta$ <i>mcsB thrC::P<sub>trxB</sub>-lacZ (ery)</i>                                                             | gDNA of HB18658 was moved into HB18986.                                                                                                                         |
| HB23040        | <i>\Delta</i> <i>ctsR amy::P<sub>hs</sub>-ctsR (cm)</i><br><i>thrC::P<sub>trxB</sub>-lacZ (ery)</i>                | A pPL82-based vector containing the <i>ctsR</i> coding region was transformed into HB23017.                                                                     |
| HB23041        | <i>\Delta</i> <i>ctsR amy::P<sub>hs</sub>-ctsR<sup>R63E</sup> (cm)</i><br><i>thrC::P<sub>trxB</sub>-lacZ (ery)</i> | A pPL82-based vector containing the <i>ctsR<sup>R63E</sup></i> coding region was transformed into HB23017.                                                      |
| HB23043        | $\Delta$ <i>ywIE</i>                                                                                               | Derivative of BKE36930 from BGSC. The erythromycin cassette was looped out using pDR244.                                                                        |
| HB23053        | $\Delta$ <i>ywIE thrC::P<sub>trxB</sub>-lacZ (ery)</i>                                                             | gDNA of HB18658 was moved into HB23043.                                                                                                                         |
| HB23054        | $\Delta$ <i>ywIE amyE::ywIE (cm)</i><br><i>thrC::P<sub>trxB</sub>-lacZ (ery)</i>                                   | The coding region of <i>ywIE</i> was cloned into pPL82 and moved into HB23053.                                                                                  |
| HB23067        | $\Delta$ <i>ywIE thrC::P<sub>trxB</sub>-lacZ (ery)</i><br><i>spx::kan</i>                                          | gDNA from HB23268 was transformed into HB23043.                                                                                                                 |
| HB23199        | $\Delta$ <i>mcsB \Delta</i> <i>ywIE</i>                                                                            | DNA from a <i>ywIE::ery</i> strain was transformed into $\Delta$ <i>mcsB</i> , and the erythromycin resistance cassette was looped out with the pDR244 plasmid. |

|         |                                                                                                 |                                                                                                                                                                       |
|---------|-------------------------------------------------------------------------------------------------|-----------------------------------------------------------------------------------------------------------------------------------------------------------------------|
| HB23206 | <i>ΔmcsB ΔywlE thrC::P<sub>trxB</sub>-lacZ (ery)</i>                                            | <i>gDNA of HB18658 was moved into HB23199.</i>                                                                                                                        |
| HB23228 | <i>ΔclpC</i>                                                                                    | <i>Derivative of BKE00860 from BGSC. The erythromycin cassette was looped out using pDR244. pDR244 was introduced into the clpC::ery strain by SPP1 transduction.</i> |
| HB23257 | <i>spx::kan</i>                                                                                 | <i>gDNA from HB11373 into HB18501 (8)</i>                                                                                                                             |
| HB23258 | <i>ΔctsR spx::kan</i>                                                                           | <i>gDNA of HB23257 was moved into HB18984.</i>                                                                                                                        |
| HB23259 | <i>spx::tet</i>                                                                                 | <i>gDNA of HB10339 (5) in HB18501</i>                                                                                                                                 |
| HB23260 | <i>ΔctsR spx::tet</i>                                                                           | <i>gDNA of HB23259 was moved into HB18984.</i>                                                                                                                        |
| HB23261 | <i>spx::kan thrC::P<sub>trxB</sub>-lacZ (ery)</i>                                               | <i>gDNA from spx::kan was transferred into HB18658.</i>                                                                                                               |
| HB23263 | <i>spx::kan amyE::P<sub>hs</sub>-spx (cm) thrC::P<sub>trxB</sub>-lacZ (ery)</i>                 | <i>A pPL82 plasmid with the spx allele was introduced into HB23261.</i>                                                                                               |
| HB23264 | <i>spx::kan amyE::P<sub>hs</sub>-spx<sup>R14K</sup> (cm) thrC::P<sub>trxB</sub>-lacZ (ery)</i>  | <i>A pPL82 plasmid with spx<sup>R14K</sup> allele was introduced into HB23261.</i>                                                                                    |
| HB23265 | <i>spx::kan amyE::P<sub>hs</sub>-spx<sup>R92K</sup> (cm) thrC::P<sub>trxB</sub>-lacZ (ery)</i>  | <i>A pPL82 plasmid with spx<sup>R92K</sup> allele was introduced into HB23261.</i>                                                                                    |
| HB23266 | <i>spx::kan amyE::P<sub>hs</sub>-spx<sup>R112K</sup> (cm) thrC::P<sub>trxB</sub>-lacZ (ery)</i> | <i>A pPL82 plasmid with spx<sup>R112K</sup> allele was introduced into HB23261.</i>                                                                                   |
| HB23268 | <i>spx::kan amyE::P<sub>hs</sub>-spx (cm)</i>                                                   | <i>A pPL82-based vector containing the spx coding region was transformed into HB23257.</i>                                                                            |
| HB23272 | <i>ΔctsR spx::kan amyE::P<sub>hs</sub>-spx (cm)</i>                                             | <i>A pPL82-based vector containing the spx coding region was transformed into HB23258.</i>                                                                            |
| HB23278 | <i>spx::kan amyE::P<sub>hs</sub>-spx<sup>DD</sup> (spec)</i>                                    | <i>DNA from HB18807 was moved into HB23257</i>                                                                                                                        |
| HB23279 | <i>ΔctsR spx::kan amyE::P<sub>hs</sub>-spx<sup>DD</sup> (spec)</i>                              | <i>DNA from HB18807 was moved into HB23258</i>                                                                                                                        |
| HB23280 | <i>spx::tet clpX::spec</i>                                                                      | <i>gDNA of HB18930 was moved into HB23259.</i>                                                                                                                        |
| HB23281 | <i>spx::kan amyE::P<sub>hs</sub>-spx (cm) clpX::spec</i>                                        | <i>gDNA of HB18930 was moved into HB23268.</i>                                                                                                                        |
| HB23282 | <i>ΔctsR spx::kan amyE::P<sub>hs</sub>-spx (cm) clpX::spec</i>                                  | <i>gDNA of HB18930 was moved into HB23272.</i>                                                                                                                        |
| HB23285 | <i>spx::tet amyE::P<sub>hs</sub>-spx (cm)</i>                                                   | <i>A pPL82-based vector containing the spx coding region was transformed into HB23259.</i>                                                                            |

|         |                                                                                                 |                                                                                                                                                     |
|---------|-------------------------------------------------------------------------------------------------|-----------------------------------------------------------------------------------------------------------------------------------------------------|
| HB23286 | <i>ΔctsR spx::tet amyE::P<sub>hs</sub>-spx (cm)</i>                                             | <i>gDNA of HB23285 was moved into HB23260</i>                                                                                                       |
| HB23287 | <i>spx::tet amyE::P<sub>hs</sub>-spx (cm) yjbH::kan</i>                                         | <i>gDNA of HB18703 was moved into HB23285</i>                                                                                                       |
| HB23288 | <i>ΔctsR spx::tet amyE::P<sub>hs</sub>-spx (cm) yjbH::kan</i>                                   | <i>gDNA of HB18703 was moved into HB23286.</i>                                                                                                      |
| HB23291 | <i>spx::tet amyE::P<sub>hs</sub>-spx (cm) clpP::kan</i>                                         | <i>gDNA of BKK34540 was moved into HB23285</i>                                                                                                      |
| HB23292 | <i>ΔctsR spx::tet amyE::P<sub>hs</sub>-spx (cm) clpP::kan</i>                                   | <i>gDNA of BKK34540 was moved into HB23286.</i>                                                                                                     |
| HB23295 | <i>spx::kan amyE::P<sub>hs</sub>-spx (cm) clpX::spec clpC::ery</i>                              | <i>gDNA of HB18931 was moved into HB23281.</i>                                                                                                      |
| HB23296 | <i>spx::kan amyE::P<sub>hs</sub>-spx (cm) clpX::spec clpE::ery</i>                              | <i>gDNA of BKE13700 was moved into HB23281.</i>                                                                                                     |
| HB23302 | <i>clpX::spec ΔmcsB</i>                                                                         | <i>DNA from clpX::spec was moved into HB18986</i>                                                                                                   |
| HB23303 | <i>clpX::spec ΔywIE</i>                                                                         | <i>DNA from clpX::spec was moved into HB23043</i>                                                                                                   |
| HB23304 | <i>clpX::spec ΔmcsB ΔywIE</i>                                                                   | <i>DNA from clpX::spec was moved into HB23199</i>                                                                                                   |
| HB23317 | <i>spx::kan amyE::P<sub>hs</sub>-spx<sup>R91K</sup> (cm) thrC::P<sub>trxB</sub>-lacZ (ery)</i>  | <i>A pPL82 plasmid with spx<sup>R91K</sup> allele was introduced into HB23261.</i>                                                                  |
| HB23319 | <i>spx::kan amyE::P<sub>hs</sub>-spx<sup>R100K</sup> (cm) thrC::P<sub>trxB</sub>-lacZ (ery)</i> | <i>A pPL82 plasmid with spx<sup>R100K</sup> allele was introduced into HB23261.</i>                                                                 |
| HB23321 | <i>amyE::P<sub>hs</sub>-mcsA-mcsB(cm)</i>                                                       | <i>The coding region of mcsA-mcsB was cloned into pPL82.</i>                                                                                        |
| HB23332 | <i>ΔmcsB ΔctsR</i>                                                                              | <i>PCR DNA from a ctsR::ery strain was transformed into ΔmcsB, and the erythromycin resistance cassette was looped out with the pDR244 plasmid.</i> |
| HB23333 | <i>amyE::ctsR (cm)</i>                                                                          | <i>The coding sequence of ctsR as well as its promoter were cloned into pDG1662, and transformed into B. subtilis.</i>                              |
| HB23363 | <i>ΔmcsB spx::kan amyE::P<sub>hs</sub>-spx (cm)</i>                                             | <i>gDNA of HB23257 was transformed into HB18986, and then the resulting strains was transformed with gDNA from HB23268.</i>                         |
| HB23364 | <i>ΔywIE spx::kan amyE::P<sub>hs</sub>-spx (cm)</i>                                             | <i>gDNA of HB23257 was transformed into HB23043, and then the resulting strains was transformed with gDNA from HB23268.</i>                         |

|         |                                                                                                  |                                                                                                                        |
|---------|--------------------------------------------------------------------------------------------------|------------------------------------------------------------------------------------------------------------------------|
| HB23365 | <i>spx::kan amyE::P<sub>hs</sub>-spx (cm) thrC::P<sub>trxB</sub>-lacZ (ery) clpX::spec</i>       | <i>gDNA of clpX::spec was transformed into HB23261</i>                                                                 |
| HB23366 | <i>ΔctsR spx::kan amyE::P<sub>hs</sub>-spx (cm) thrC::P<sub>trxB</sub>-lacZ (ery) clpX::spec</i> | <i>gDNA of clpX::spec was transformed into HB23262</i>                                                                 |
| HB23367 | <i>ΔmcsB spx::kan amyE::P<sub>hs</sub>-spx (cm) clpX::spec</i>                                   | <i>gDNA of HB18930 was moved into HB23363</i>                                                                          |
| HB23368 | <i>ΔywIE spx::kan amyE::P<sub>hs</sub>-spx (cm) clpX::spec</i>                                   | <i>gDNA of HB18930 was moved into HB23364</i>                                                                          |
| HB23371 | <i>ΔctsR ΔmcsB spx::kan amyE::P<sub>hs</sub>-spx (cm)</i>                                        | <i>gDNA of HB23268 was transformed into HB23332</i>                                                                    |
| HB23372 | <i>ΔmcsB ΔywIE spx::kan amyE::P<sub>hs</sub>-spx (cm)</i>                                        | <i>gDNA of HB23268 was transformed into HB23199</i>                                                                    |
| HB23373 | <i>ΔmcsB ΔywIE spx::kan amyE::P<sub>hs</sub>-spx (cm) clpX::spec</i>                             | <i>gDNA of clpX::spec was introduced into HB23372</i>                                                                  |
| HB23374 | <i>ΔctsR ΔmcsB spx::kan amyE::P<sub>hs</sub>-spx (cm) clpX::spec</i>                             | <i>gDNA of clpX::spec was introduced into HB23371</i>                                                                  |
| HB23378 | <i>ΔctsR ΔmcsB thrC::P<sub>trxB</sub>-lacZ (ery)</i>                                             | <i>gDNA from HB23363 into HB23332</i>                                                                                  |
| HB23380 | <i>ΔctsR ΔmcsB amyE::ctsR (cm) thrC::P<sub>trxB</sub>-lacZ (ery)</i>                             | <i>gDNA from HB23333 into HB23378</i>                                                                                  |
| HB23381 | <i>ΔmcsB ΔctsR amyE::P<sub>hs</sub>-mcsAB (cm) thrC::P<sub>trxB</sub>-lacZ (ery)</i>             | <i>gDNA from HB23321 into HB23378</i>                                                                                  |
| HB23400 | <i>P<sub>spac</sub>-mcsAB-clpC (spec)</i>                                                        | <i>pMUTIN-Flag (spec) plasmid containing the C-terminal region of ctsR and N-terminal region of mcsB into HB18501.</i> |
| HB23401 | <i>P<sub>spac</sub>-mcsAB-clpC (spec) thrC::P<sub>trxB</sub>-lacZ (ery)</i>                      | <i>Plasmid DNA into HB18658.</i>                                                                                       |
| HB23404 | <i>P<sub>spac</sub>-clpC (spec) thrC::P<sub>trxB</sub>-lacZ (ery)</i>                            | <i>Plasmid DNA into HB18658.</i>                                                                                       |
| HB23407 | <i>P<sub>spac</sub>-clpC (spec)</i>                                                              | <i>pMUTIN-Flag (spec) plasmid containing the C-terminal region of mcsB and N-terminal region of clpC into HB18501.</i> |
| HB23414 | <i>ΔywIE spx::kan amyE::P<sub>hs</sub>-spx (cm) thrC::P<sub>trxB</sub>-lacZ (ery)</i>            | <i>A pPL82 plasmid with the spx allele was introduced into HB23067.</i>                                                |



|         |                                                                                                     |                                                                        |
|---------|-----------------------------------------------------------------------------------------------------|------------------------------------------------------------------------|
| HB23415 | $\Delta ywIE$ $spx::kan$ $amyE::P_{hs}$ -<br>$spx^{R14K}$ (cm) $thrC::P_{trxB}$ -lacZ<br>(ery)      | A pPL82 plasmid with $spx^{R14K}$ allele was introduced into HB23067.  |
| HB23416 | $\Delta ywIE$ $spx::kan$ $amyE::P_{hs}$ -<br>$spx^{R91K}$ (cm) $thrC::P_{trxB}$ -lacZ<br>(ery)      | A pPL82 plasmid with $spx^{R91K}$ allele was introduced into HB23067.  |
| HB23417 | $\Delta ywIE$ $spx::kan$ $amyE::P_{hs}$ -<br>$spx^{R92K}$ (cm) $thrC::P_{trxB}$ -lacZ<br>(ery)      | A pPL82 plasmid with $spx^{R92K}$ allele was introduced into HB23067.  |
| HB23417 | $\Delta ywIE$ $spx::kan$ $amyE::P_{hs}$ -<br>$spx^{R100K}$ (cm) $thrC::P_{trxB}$ -lacZ<br>(ery)     | A pPL82 plasmid with $spx^{R100K}$ allele was introduced into HB23067. |
| HB23419 | $\Delta ywIE$ $spx::kan$ $amyE::P_{hs}$ -<br>$spx^{R112K}$ (cm) $thrC::P_{trxB}$ -lacZ<br>(ery)     | A pPL82 plasmid with $spx^{R112K}$ allele was introduced into HB23067. |
| HB23424 | $spx::kan$ $amyE::P_{hs}$ - $spx$ (cm)<br>$thrC::P_{trxB}$ -lacZ (ery) $clpP::tet$                  | gDNA of $clpP::tet$ was transformed into HB23261                       |
| HB23425 | $\Delta ctsR$ $spx::kan$ $amyE::P_{hs}$ - $spx$<br>(cm) $thrC::P_{trxB}$ -lacZ (ery)<br>$clpP::tet$ | gDNA of $clpP::tet$ was transformed into HB23262                       |

**Table S3. Primers used in this study**

| <b>Number</b> | <b>Sequence</b>                           |
|---------------|-------------------------------------------|
| <b>DR445</b>  | ATCACCCGGGGATGTTTCATCCTACTAATTAGAGGAG     |
| <b>DR446</b>  | ATCGTCTAGACGAGCATTATTACCAGCAGGTTG         |
| <b>DR315</b>  | ATCGACCCGGGGTCAAAGTCAGTAAAGGAGG           |
| <b>DR316</b>  | ATCGTCTAGAGACAAATCAATCTTTTCACCC           |
| <b>DR345</b>  | TTGTTGAGAGCAAAGAAGGGGGCGGCGTTACATC        |
| <b>DR346</b>  | CCCTTCTTTGCTCTCAACAATATATCCTCTTT          |
| <b>DR450</b>  | ATCAGAATTCGTGAGAGTAGGACGCCGCAAG           |
| <b>DR451</b>  | ATCAGGATCCGCACTCTTGACAAATCAATCTTTTCACCC   |
| <b>DR415</b>  | TTCATGCAAAAAGGCGAGAGCGTGG                 |
| <b>DR416</b>  | CTCTCGCCTTTTTGCATGAAGTACAGCTTGGTGATGTG    |
| <b>DR393</b>  | CCAGGTTTGCTTAAACGTCCGATCATCATTGACGAAAAACG |
| <b>DR394</b>  | CGGACGTTTAAGCAAACCTGGATGCTCGTTG           |
| <b>DR426</b>  | GCTTCGCAAACCGATCATCATTGACGAAAAAC          |
| <b>DR427</b>  | GATGATCGGTTTGCGAAGCAAACCTGGATGCTCG        |
| <b>DR419</b>  | AAAAAATTGCAGGTCGGATATAACG                 |
| <b>DR420</b>  | TATCCGACCTGCAATTTTTTTTTTCGTCAATGATGATCGG  |
| <b>DR397</b>  | GACGAAATCAGAAAATTCCTGCCAAGAAAAGTTCGCTC    |
| <b>DR398</b>  | GGCAGGAATTTTCTGATTTTCGTCTTCGTTATATCC      |
| <b>DR166</b>  | GGATAACAATTAAGCTTTCGGTAAAAGAAAAAGTGAGAC   |
| <b>DR366</b>  | GCTACAAGTTTACGAACCTGATCTTG                |
| <b>DR365</b>  | GTTCGTAAACTTGTAGCTGGACCTGGTG              |
| <b>DR342</b>  | ATCAGGTACCCAACATCATCAACTTTGCTGTTGG        |
| <b>DR452</b>  | ATCGAAGCTTGAGGATATATTGTTGAGAGCAAACG       |
| <b>DR453</b>  | ATCAGGTACCGGTGTAATGTTGCTATGAAATGTTTTG     |

|              |                                                  |
|--------------|--------------------------------------------------|
| <b>DR454</b> | ATCGAAGCTTGCGAAGCAGTAGGGAATATCTTTC               |
| <b>DR455</b> | ATCAGGTACCGCTGATGATCCTGTTTCATTACTTCC             |
| <b>DR362</b> | ATCACCCGGGGAAATTCGTTTGGATTAAAGCTGCTTTTGC         |
| <b>DR363</b> | ATCGTCTAGAAAGCTTGACCTGTTTGCAGATTTTCTGAC          |
| <b>DR309</b> | CCACCGCGTTTCTATCACTG                             |
| <b>DR310</b> | ATCGATAATACGACTCACTATAGGGAGAGCCGCATCCTTCTCTTTACG |
| <b>DR302</b> | GTGGAAGCTGAGCACATTCA                             |
| <b>DR303</b> | ATCGATAATACGACTCACTATAGGGAGAGCTTCGTCTTACCGCTTTTG |
| <b>6299</b>  | GCTTGTAATTTCTATCATAATTG                          |
| <b>6300</b>  | AGGGAATCATTGGAAGGTTGG                            |
| <b>6301</b>  | GCATTTAATACTAGCGACGCC                            |
| <b>DR16</b>  | GCTGTCAGCCGAAATGAGTC                             |
| <b>DR17</b>  | CCTCAAATGGTTTCGCTGTCAAGATGATCGATCCTCCGCTTC       |
| <b>DR18</b>  | CCTACGAGGAATTTGTATCGCCGCAGGCGTGCATATG            |
| <b>DR19</b>  | GAAATGGAAGAGCTGCTGATG                            |
| <b>1295</b>  | CAGCGAACCATTTGAGGTGATAGG                         |
| <b>1296</b>  | CGATACAAATTCCTCGTAGGCGCTCGG                      |
| <b>DR238</b> | GATAAGACGGTTTCGTGTTTCGCCTAGGTCTAGAGGATCGATC      |
| <b>DR239</b> | TACAAAAGCGACTCATAGA ACTAATTGAGAGAAGTTTCTATAG     |
| <b>DR240</b> | TTCTATGAGTCGCTTTTGTAAATTTGG                      |
| <b>DR241</b> | CGAACACGAACCGTCTTATCTC                           |

**Table S4. Co-occurrence of Spx and related proteins in representative Firmicutes species**

The co-occurrence of *spx*, *mcsB*, *mecA*, *yjbH*, and *clpC* was explored in representative strains of *Bacillus subtilis* [168], *Listeria monocytogenes* [ATCC 19117], *Staphylococcus aureus* [ATCC BAA 39], *Enterococcus faecalis* [ATCC 29212], *Lactobacillus rhamnosus* [GG ATCC 53103], *Lactobacillus acidophilus* [ATCC 4796], *Streptococcus pneumoniae* [ATCC 49619], *Streptococcus pyogenes* [NCTC13739], and *Lactococcus lactis* [IL6288], as well as in Firmicutes that do not possess Spx homologs including *Veillonella parvula* [DSM 2008], and *Blautia producta* [PMF1], *Ruminococcus albus* [DSM 20455], *Roseburia hominis* [A2 183], and *Coprococcus catus* [GD 7]. The analysis was performed using the SyntTax software (9). Only proteins with a score > 15 are displayed in the table below.

|                                  | <b><i>spx</i></b> | <b><i>mcsB</i></b> | <b><i>yjbH</i></b> | <b><i>mecA</i></b> | <b><i>clpC</i></b> |
|----------------------------------|-------------------|--------------------|--------------------|--------------------|--------------------|
| <i>Bacillus subtilis</i>         | Yes (100)         | Yes (100)          | Yes (100)          | Yes (100)          | Yes (100)          |
| <i>Listeria monocytogenes</i>    | Yes (86.94)       | Yes (47.78)        | Yes (30.11)        | Yes (38.10)        | Yes (76.80)        |
| <i>Staphylococcus aureus</i>     | Yes (85.45)       | Yes (37.42)        | Yes (20.77)        | Yes (25.85)        | Yes (68.74)        |
| <i>Enterococcus faecalis</i>     | Yes (80.60)       | No                 | No                 | Yes (15.80)        | Yes (56.90)        |
| <i>Lactobacillus rhamnosus</i>   | Yes (72.76)       | No                 | No                 | Yes (19.73)        | Yes (55.13)        |
| <i>Lactobacillus acidophilus</i> | Yes (71.27)       | No                 | No                 | No                 | Yes (47.50)        |
| <i>Streptococcus pneumoniae</i>  | Yes (67.16)       | No                 | No                 | No                 | Yes (39.62)        |
| <i>Streptococcus pyogenes</i>    | Yes (63.06)       | No                 | No                 | No                 | Yes (38.22)        |
| <i>Lactococcus lactis</i>        | Yes (60.45)       | No                 | No                 | No                 | Yes (45.73)        |
| <i>Veillonella parvula</i>       | No                | Yes (37.82)        | No                 | No                 | Yes (57.57)        |
| <i>Blautia producta</i>          | Yes (16.83)       | No                 | No                 | No                 | Yes (50.43)        |
| <i>Ruminococcus albus</i>        | Yes (16.53)       | No                 | No                 | No                 | Yes (42.80)        |
| <i>Roseburia hominis</i>         | No                | No                 | No                 | No                 | Yes (48.90)        |
| <i>Coprococcus catus</i>         | No                | Yes (21.40)        | No                 | No                 | Yes (51.53)        |

## Supplementary Figures

### Fig. S1 The phenotype due to *ctsR* inactivation is explained by ClpP proteolysis as well as another unknown pathway

$P_{\text{trxB}}$  activity was assessed in liquid LB on  $spx^{\text{cond}} \Delta clpX (=clpX::\text{spec})$  and  $spx^{\text{cond}} \Delta clpP (=clpP::\text{tet})$  cells grown in presence of 100  $\mu\text{M}$  IPTG to induce *spx* expression. Multiple t-test were performed to compare the mean value of each pair of strains. \*, \*\*, \*\*\* indicate significant differences with  $p < 0.05$ ,  $p < 0.01$ , and  $p < 0.001$ , respectively. Error bars represent SEM of at least three independent replicates.

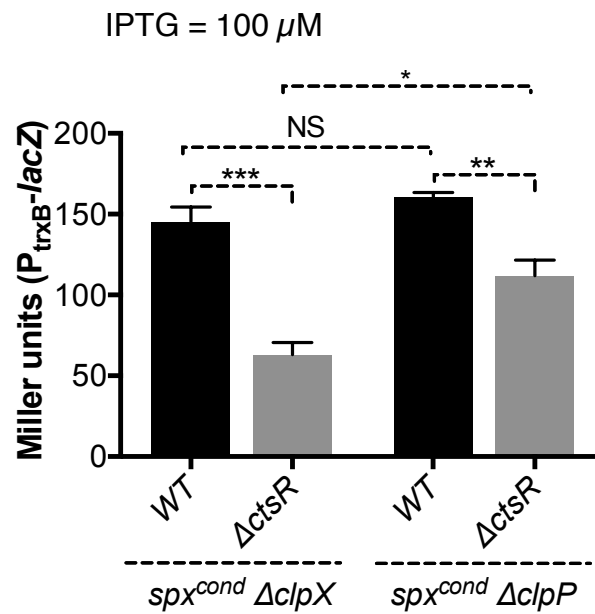

**Fig. S2 *In vivo* ClpX-independent Spx degradation in *Bacillus subtilis* occurs through ClpCP**

A protein chase was performed in *spx<sup>cond</sup>* cells lacking *clpX*, *clpX clpE*, *clpX clpC*, or *clpP* to determine Spx stability. For this, cells were grown up to OD<sub>600</sub>~0.1 and treated with IPTG (100 μM) to induce *spx* expression. When OD<sub>600</sub> reached 0.4-0.6 cells were subjected to analysis. Samples were taken before and after treatment with 100 μg/ml of chloramphenicol to stop protein synthesis. *ΔclpX* was used to identify *clpX::spec*, *ΔclpE* and *ΔclpC* to identify *clpE::ery* and *clpC::ery*, respectively, and *ΔclpP* to identify *clpP::tet*. As observed, the Spx levels were lower in *ΔclpXC* cells compared with *ΔclpP*, yet the molecular bases remain unclear.

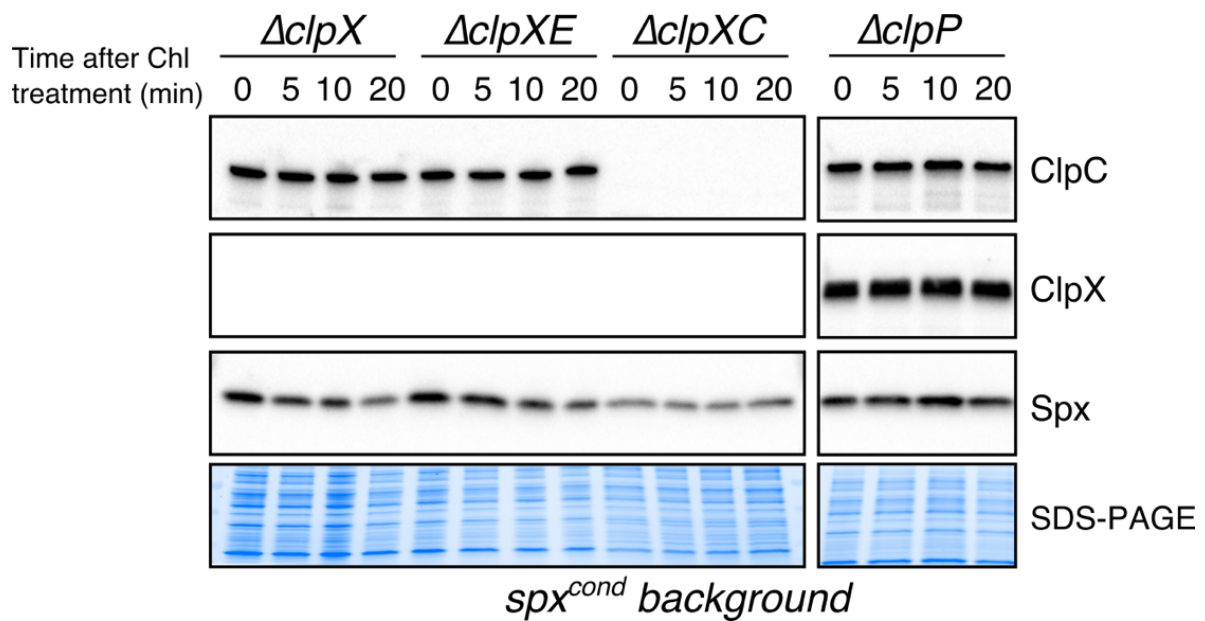

**Fig. S3 Elevated arginine phosphorylation affects Spx activity**

A) Ectopic complementation of the  $\Delta ywIE$  strain also restored the WT phenotype. B) The differences between WT and  $\Delta ywIE$  are independent of *spx* transcription and ClpXP-dependent proteolysis.

**A**

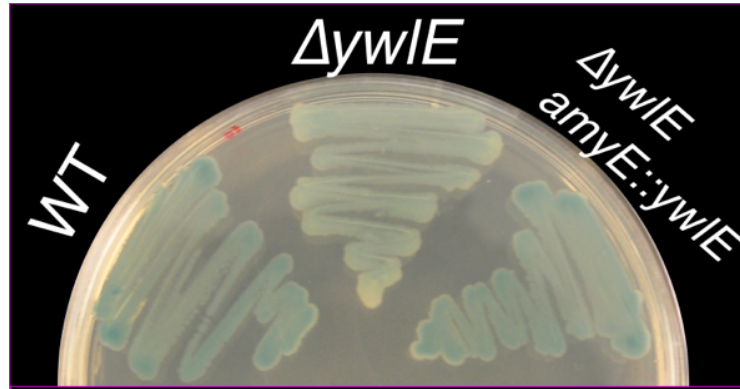

**B**

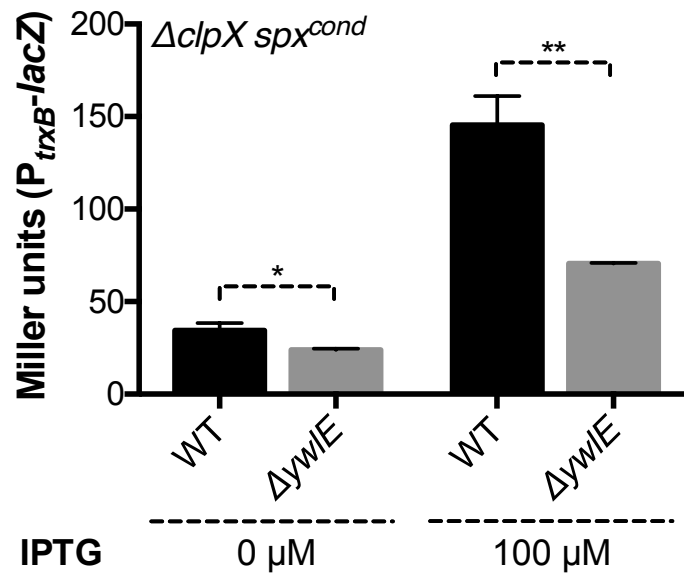

**Fig. S4 Spx accumulation negatively affects bacterial growth**

Plating efficiency of cells harboring a *spx<sup>DD</sup>* or *spx* allele under control of an IPTG-inducible promoter. The *spx* alleles were studied in WT and  $\Delta$ *ctsR* cells. Bacteria were plated on LB supplemented or not with 100  $\mu$ M IPTG.

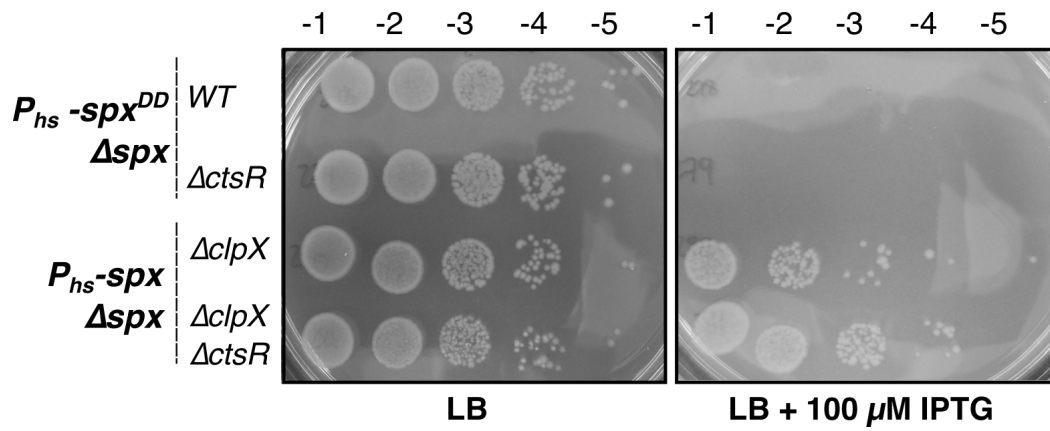



## Fig. S5 Alignment of Spx proteins in different species

Spx proteins from representative Firmicutes were aligned using the Geneious alignment algorithm in the Geneious 11.1.5 software. The Blosum62 cost matrix was used with the following parameters: gap open penalty = 12, gap extension penalty = 3, and refinement iterations = 2. A) Alignment of Spx proteins (which display the G52 residue) in species containing McsB. In all Spx proteins the arginine residues are conserved at positions 14, 91, and 92, whereas the positions 100 and 112 are conserved in the closest Spx homologs (see Fig. S5C) but not in the MgsR paralog (where the Arg is replaced by Lys). B) Alignment of Spx proteins in species lacking *mcsB*. The Spx homologs were searched using tblastn, using as template the reference genomes shown in Table S4. In these species the arginine residues at positions 14 and 91 were conserved, but some lysine residues were also observed at these positions. At positions 92 and 112 the arginine residues were highly conserved except for the less similar Spx homologs in *L. lactis* and *L. acidophilus*, respectively. The arginine at position 100 was much less conserved in all these species, and His and Cys residues were found instead. C) Phylogenetic tree of Spx proteins in McsB-containing species shows that the MgsR proteins in both *B. subtilis* and *B. amyloliquefaciens* are more distantly related to other Spx proteins. *Bacillus subtilis* Yusl was used as outgroup. The alignment and phylogenetic tree were constructed in the Geneious 11.1.5 software using the default parameters. Additional sequences were obtained from the following RefSeq genomes: *Bacillus amyloliquefaciens* DSM7, *Bacillus cereus* ATCC 14579, *Bacillus anthracis* str. Ames.

### A

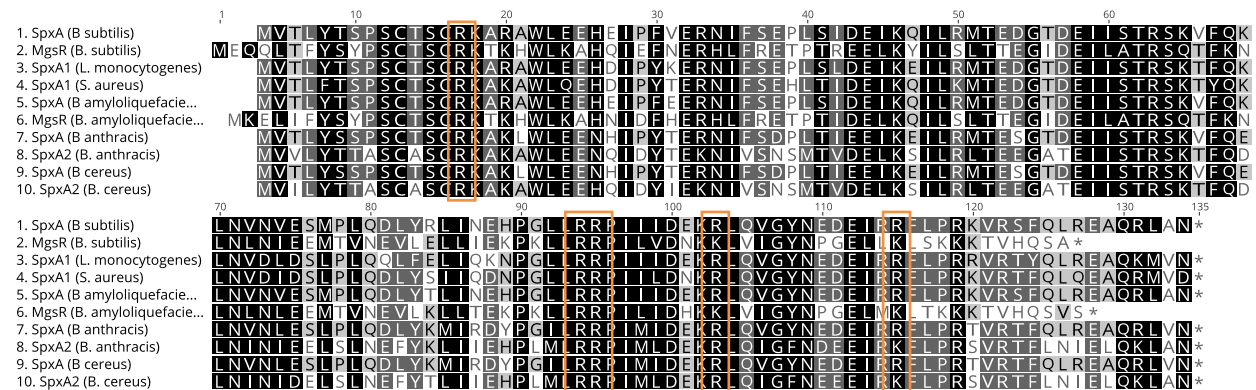

## B

1. SpxA1 (*E. faecalis*)
2. SpxA1 (*L. acidophilus*)
3. SpxA2 (*L. acidophilus*)
4. SpxA1 (*L. rhamnosus*)
5. SpxA2 (*L. rhamnosus*)
6. SpxA1 (*L. lactis*)
7. SpxA2 (*L. lactis*)
8. SpxA3 (*L. lactis*)
9. SpxA4 (*L. lactis*)
10. SpxA5 (*L. lactis*)
11. SpxA6 (*L. lactis*)

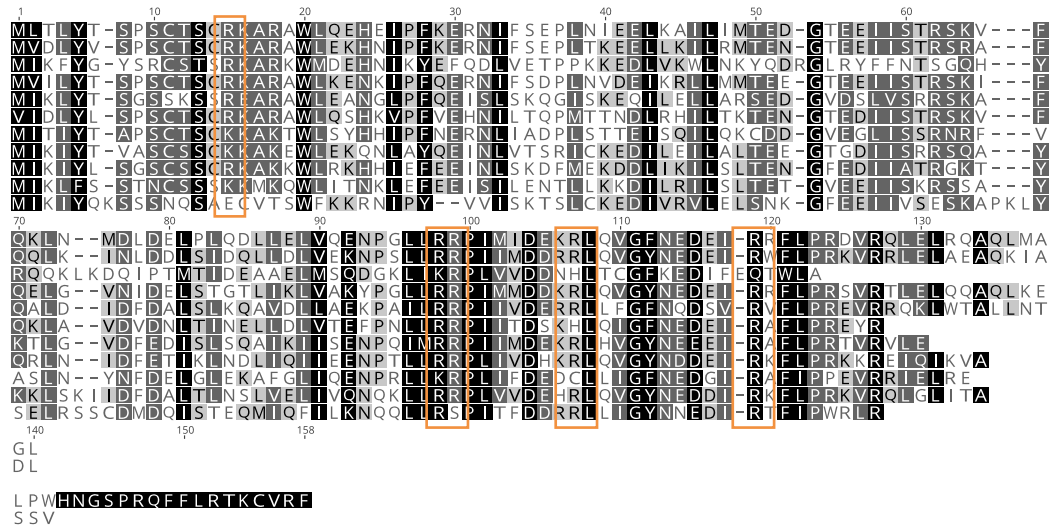

## C

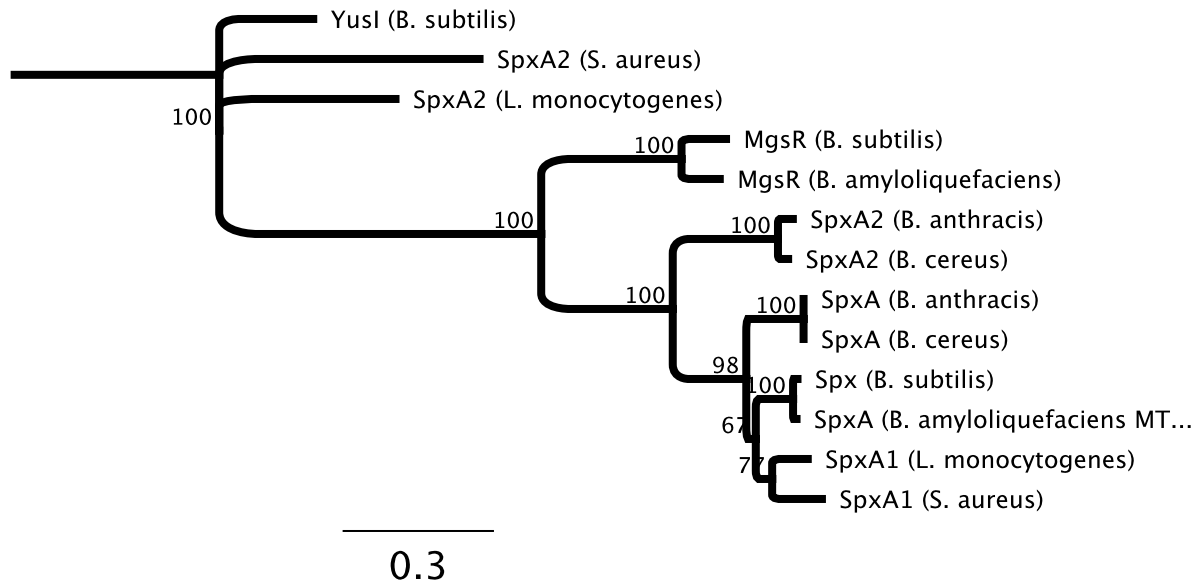

## References

1. Koo B-M, Kritikos G, Farelli JD, Todor H, Tong K, Kimsey H, Wapinski I, Galardini M, Cabal A, Peters JM, Hachmann A-B, Rudner DZ, Allen KN, Typas A, Gross CA. 2017. Construction and Analysis of Two Genome-Scale Deletion Libraries for *Bacillus subtilis*. *Cell Syst* 4:291–305.e7.
2. Quisel JD, Burkholder WF, Grossman AD. 2001. In vivo effects of sporulation kinases on mutant Spo0A proteins in *Bacillus subtilis*. *J. Bacteriol.* 183:6573–6578.
3. Guérout-Fleury AM, Frandsen N, Stragier P. 1996. Plasmids for ectopic integration in *Bacillus subtilis*. *Gene.* 180:57-61.
4. Vagner V, Dervyn E, Ehrlich SD. 1998. A vector for systematic gene inactivation in *Bacillus subtilis*. *Microbiology.* 144:3097-3104.
5. Luo Y, Helmann JD. 2012. Analysis of the role of *Bacillus subtilis*  $\sigma^M$  in  $\beta$ -lactam resistance reveals an essential role for c-di-AMP in peptidoglycan homeostasis. *Mol Microbiol.* 83:623-639.
6. Rojas-Tapias DF, Helmann JD. 2018. Stabilization of *Bacillus subtilis* Spx under cell wall stress requires the anti-adaptor protein YirB. *PLoS Genet* 14:e1007531.
7. Nakano S, Küster-Schöck E, Grossman AD, Zuber P. 2003. Spx-dependent global transcriptional control is induced by thiol-specific oxidative stress in *Bacillus subtilis*. *Proc Natl Acad Sci U S A.* 100:13603-13608.
8. Gaballa A, Antelmann H, Hamilton CJ, Helmann JD. 2013. Regulation of *Bacillus subtilis* bacillithiol biosynthesis operons by Spx. *Microbiology.* 159:2025-2035.
9. Oberto J. 2013 SyntTax: a web server linking synteny to prokaryotic taxonomy. *BMC Bioinformatics.* Jan 16;14:4. doi: 10.1186/1471-2105-14-4.
